# Supplementary material for: FGF ligands inDrosophilahave distinct activities required to support cell migration and differentiation
Source: Oxford University Press journal article supplement (doi:10.1242/dev.027904), 2009-01-22
Supplement: dev027904-sup-027904-figs4.pdf [file dev027904-sup-027904-figs4.pdf]

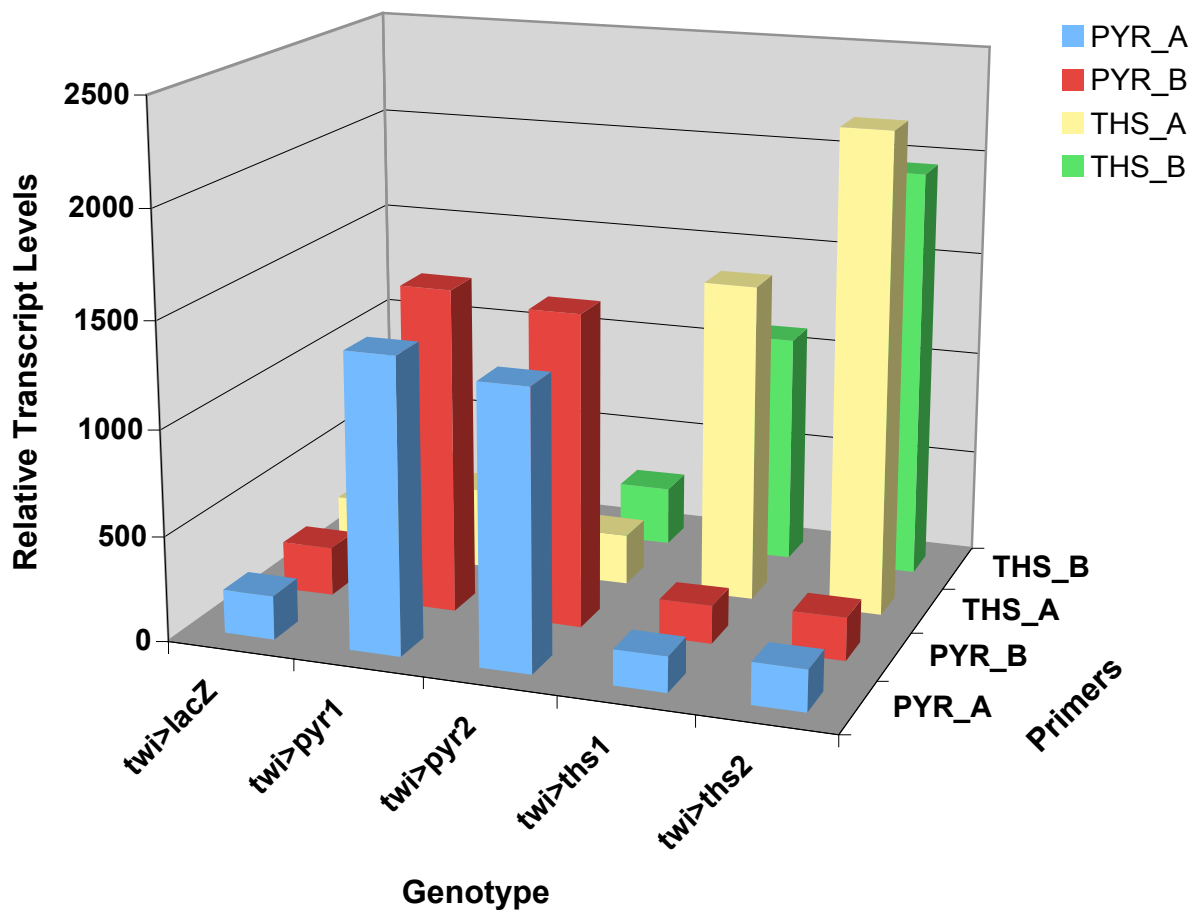

|              | Number of molecules per primer combination<br>(arbitrary units) |          |          |          |          |
|--------------|-----------------------------------------------------------------|----------|----------|----------|----------|
|              | twi>lacZ                                                        | twi>pyr1 | twi>pyr2 | twi>ths1 | twi>ths2 |
| <b>PYR_A</b> | 208.51                                                          | 1392.13  | 1314.43  | 168.48   | 193.21   |
| <b>PYR_B</b> | 233.37                                                          | 1537.62  | 1480.95  | 180.82   | 205.08   |
| <b>THS_A</b> | 264.10                                                          | 382.35   | 239.38   | 1510.69  | 2278.30  |
| <b>THS_B</b> | 271.80                                                          | 403.17   | 281.27   | 1099.08  | 1956.22  |
