# Supplementary material for: FGF ligands inDrosophilahave distinct activities required to support cell migration and differentiation
Source: Oxford University Press journal article supplement (doi:10.1242/dev.027904), 2009-01-22
Supplement: dev027904-sup-027904-figs5.pdf [file dev027904-sup-027904-figs5.pdf]

Frequency of clumping phenotype in embryos ectopically expressing *pyramus* and *thisbe*

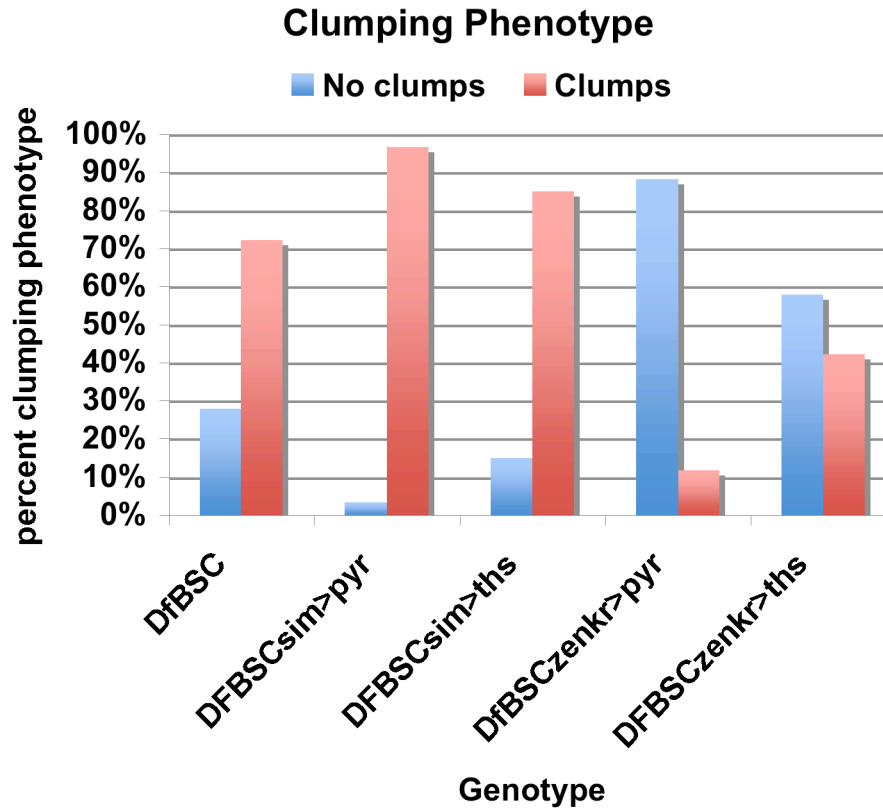

| Genotype              | Total Number | No clumps | Clumps | p-value  |
|-----------------------|--------------|-----------|--------|----------|
| DfBSC25               | 36           | 10        | 26     |          |
| DFBSC25,sim>pyr       | 30           | 1         | 29     | <0.01    |
| DFBSC25,sim>ths       | 40           | 6         | 34     | n.s      |
| DfBSC25,zenVRE.Kr>pyr | 17           | 15        | 2      | < 0.0001 |
| DFBSC25,zenVRE.Kr>ths | 19           | 11        | 8      | n.s      |
