# Supplementary material for: FGF ligands inDrosophilahave distinct activities required to support cell migration and differentiation
Source: Oxford University Press journal article supplement (doi:10.1242/dev.027904), 2009-01-22
Supplement: dev027904-sup-027904-figs6.pdf [file dev027904-sup-027904-figs6.pdf]

Frequency of multilayered phenotype in embryos ectopically expressing *pyramus* and *thisbe*

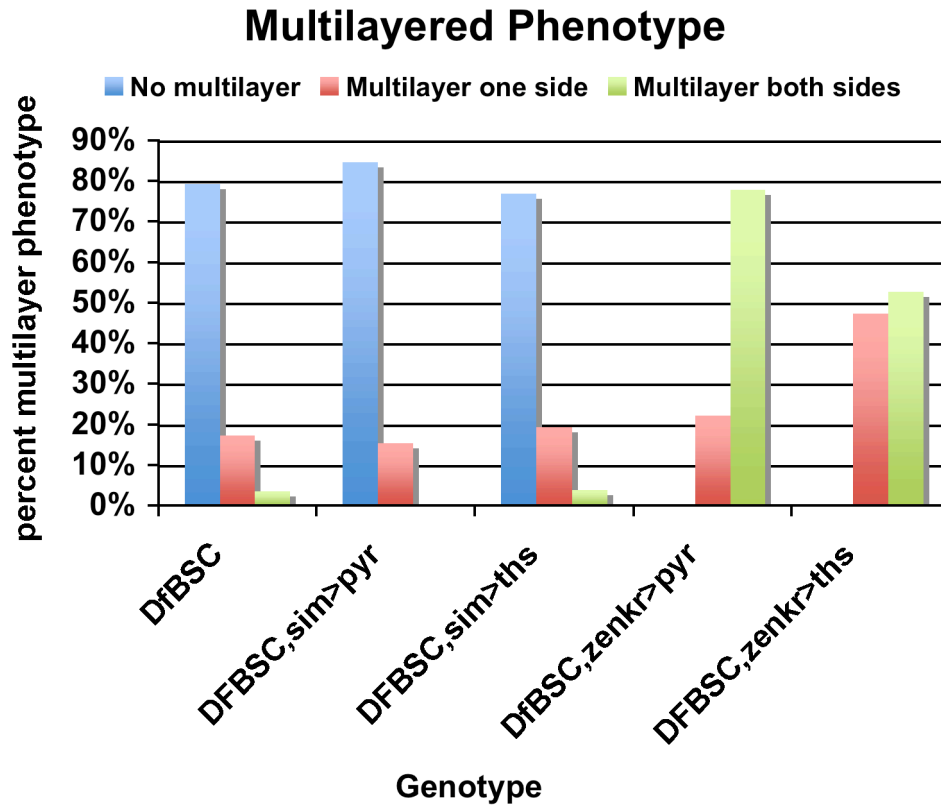

| Genotype       | No multilayer | Multilayer (one side) | p-value   | Multilayer (both sides) | p-value  |
|----------------|---------------|-----------------------|-----------|-------------------------|----------|
| DfBSC          | 23            | 5                     |           | 1                       |          |
| DFBSsim>pyr    | 22            | 4                     | n.s.      | 0                       | n.s.     |
| DFBSsim>ths    | 20            | 5                     | n.s.      | 1                       | n.s.     |
| DfBSCzenkr>pyr | 0             | 4                     | < 0.01    | 14                      | < 0.0001 |
| DFBSzenkr>ths  | 0             | 9                     | < 0.00001 | 10                      | < 0.0001 |
