# Supplementary figures and images for: FGF ligands inDrosophilahave distinct activities required to support cell migration and differentiation
Source: Oxford University Press journal article supplement (doi:10.1242/dev.027904), 2009-01-22

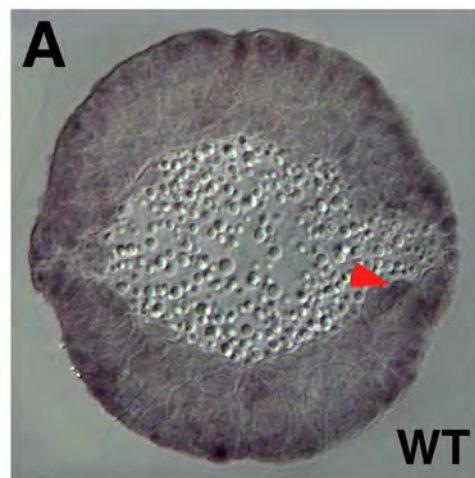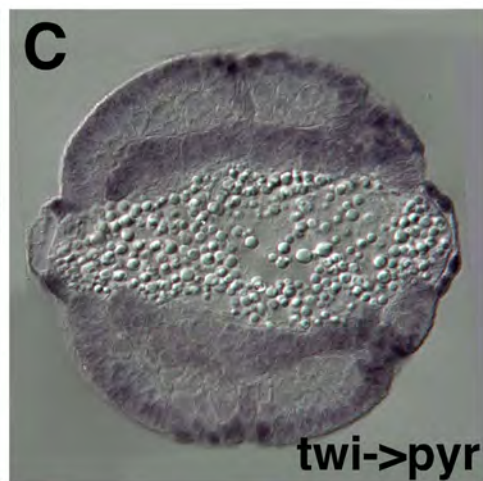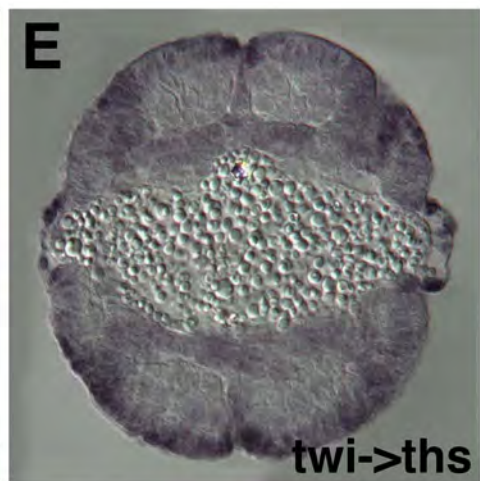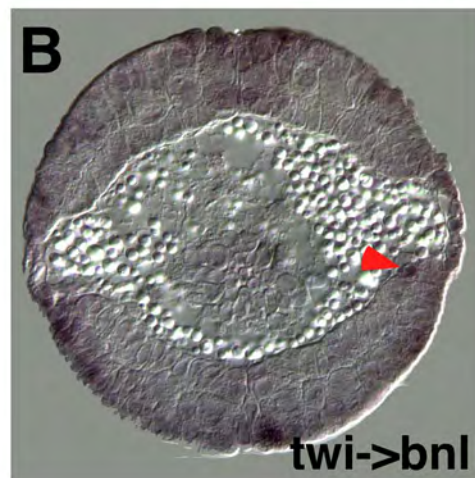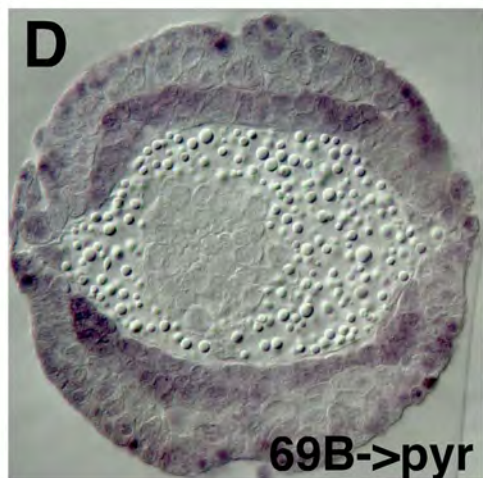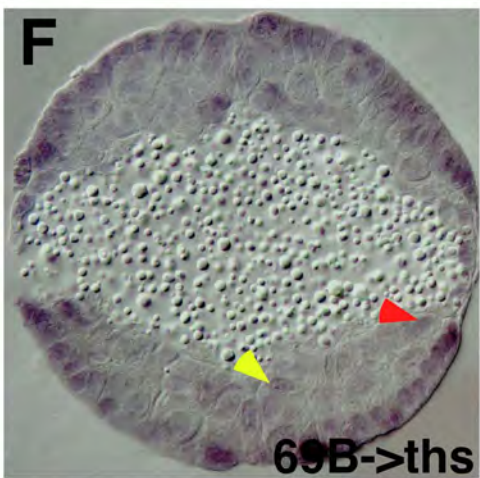

Supplement: dev027904-sup-027904-figs1.pdf [file dev027904-sup-027904-figs1.pdf]

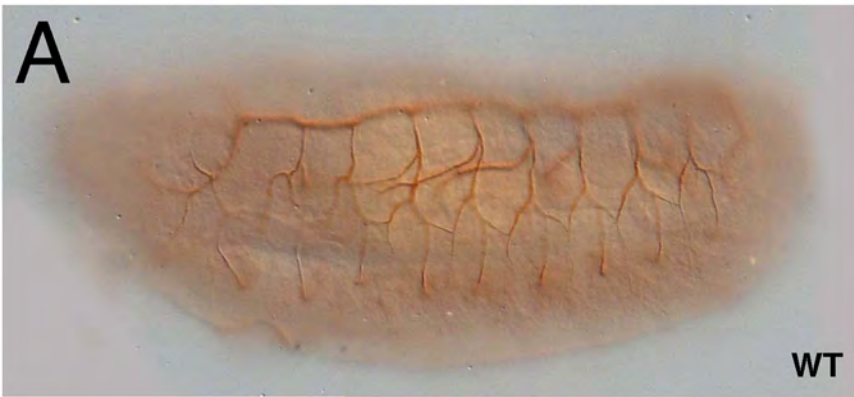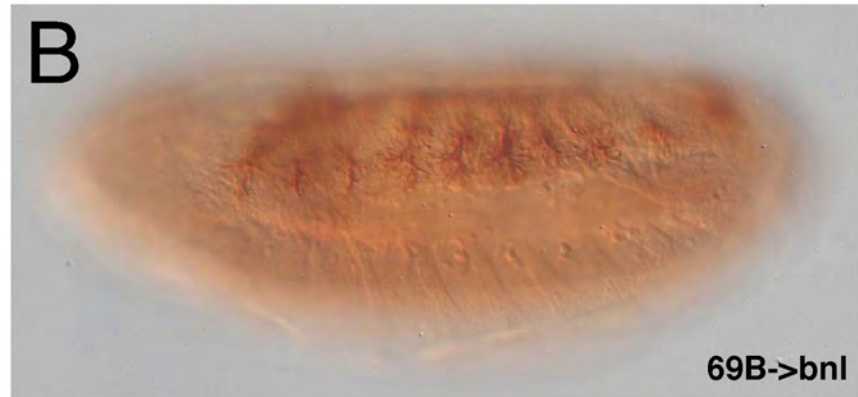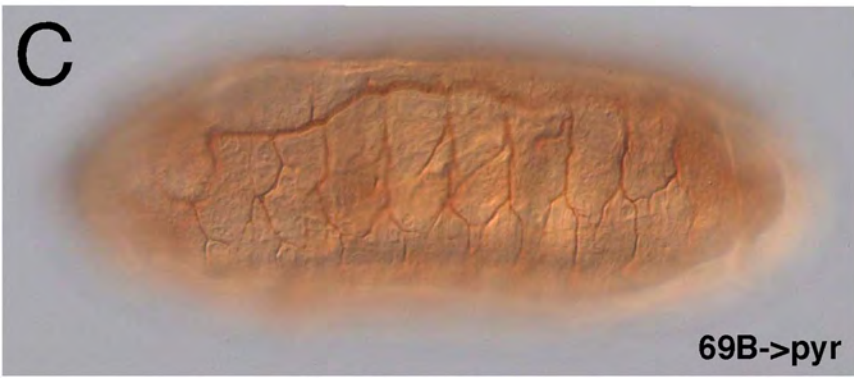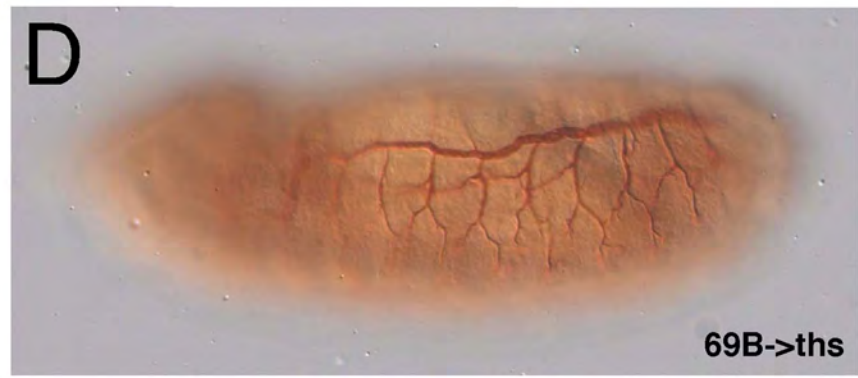

Supplement: dev027904-sup-027904-figs2.pdf [file dev027904-sup-027904-figs2.pdf]

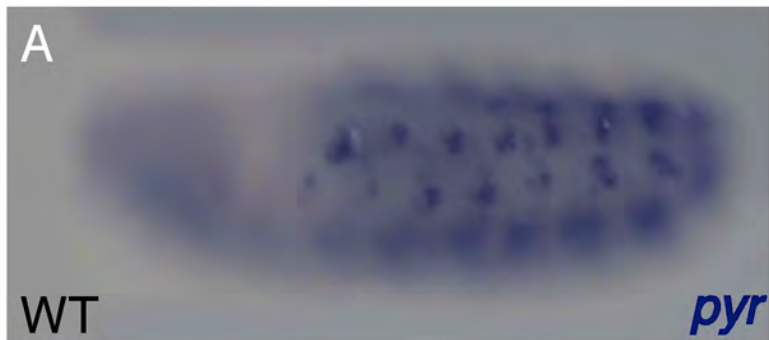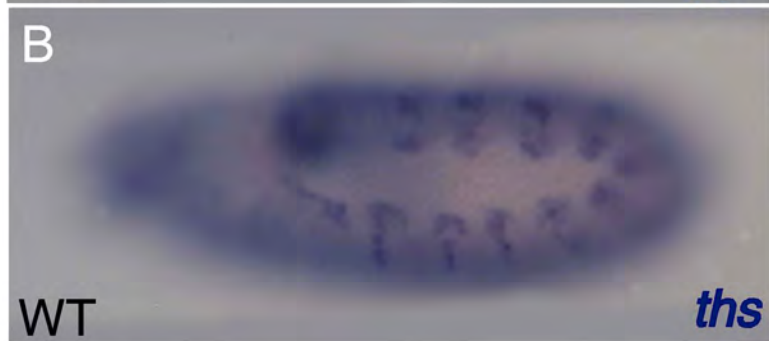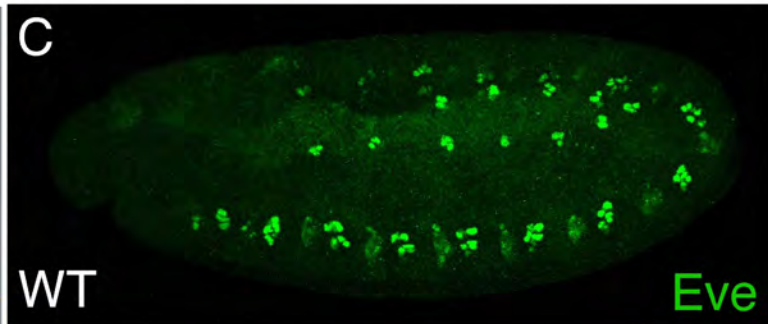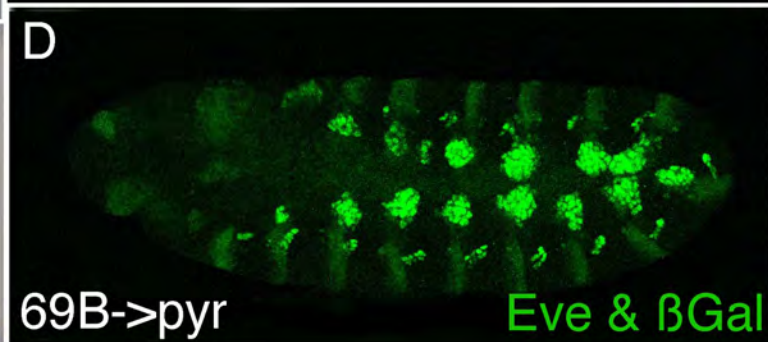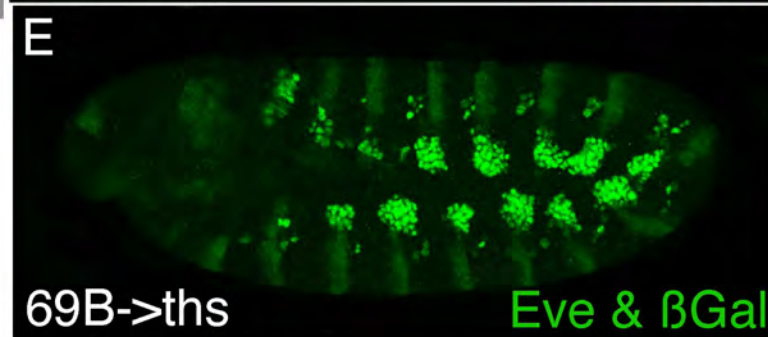

Supplement: dev027904-sup-027904-figs3.pdf [file dev027904-sup-027904-figs3.pdf]
